# Supplementary material for: Effect of live yeast Saccharomyces cerevisiae supplementation on the performance and cecum microbial profile of suckling piglets
Source: PLoS One. 2019 Jul 22;14(7):e0219557. doi: 10.1371/journal.pone.0219557 (PMC6645501; doi:10.1371/journal.pone.0219557)
Supplement: S1 Table — Piglets were treated by oral gavage with either 5 x109 cfu (Low) dose or 2.5 x 1010 cfu (High) dose of live yeast or sterile water (Control) every other day starting from day one of age until weaning. Body weight was recorded at regular intervals and presented either as piglet weight in kilograms or daily weight gain in kilograms. (XLSX) [file pone.0219557.s001.xlsx]

## Sheet: Sheet1
						Weight of individual piglets at each time point (Kg)
Sample ID	Tag ID	Sow ID	Date of birth	Sex	Treatment	day1	day3	day10	day 17	day24	day 28	Age at weaning	ADG
L1	34	208-5Y	2013-01-15	M	Control	1.9	2.3	3.6	5.9	8.35	9.75	28	0.280357
L2	35	208-5Y	2013-01-15	F	Control	1.3	1.6	2.8	5.15	8.15	9.65	28	0.298214
L3	86	208-5Y	2013-01-15	M	Control	1.5	1.4	1.9	3.4	5.35	6.4	28	0.175
L4	87	208-5Y	2013-01-15	M	Control	1.3	1.25	2.35	4	5.95	7.25	28	0.2125
L5	37	579-11Y	2013-01-15	F	Control	1.5	1.8	3.2	5	7	8.1	28	0.235714
L6	38	579-11Y	2013-01-15	M	Control	1.8	1.8	3.5	5.95	8.45	9.65	28	0.280357
L7	93	579-11Y	2013-01-15	M	Control	1.65	2	3.55	5.8	8.35	9.6	28	0.283929
L8	94	579-11Y	2013-01-15	F	Control	1.25	1.55	3.2	5.2	7.2	8	28	0.241071
L9	24	P46Y	2013-01-14	F	Control	1.35	1.5	2.55	4.15	6.5	7.9	29	0.225862
L10	25	P46Y	2013-01-14	M	Control	1.6	1.85	3.45	5.05	6.05	7.3	29	0.196552
L11	96	P46Y	2013-01-14	F	Control	1.35	1.45	2.85	4.6	6.65	7.6	29	0.215517
L12	97	P46Y	2013-01-14	M	Control	1.25	1.55	2.75	4.5	6	7.05	29	0.2
L13	28	589-6Y	2013-01-14	M	Control	1.6	1.8	3.35	4.65	6.65	7.75	29	0.212069
L14	29	589-6Y	2013-01-14	F	Control	1.35	1.55	3.4	5.05	7.2	8.3	29	0.239655
L15	99	589-6Y	2013-01-14	F	Control	1.65	1.85	3.5	4.9	6.3	7.2	29	0.191379
L16	100	589-6Y	2013-01-14	M	Control	1.45	1.7	3.25	4.9	6.85	7.85	29	0.22069
L17	2	14-3x	2013-01-16	M	Low Yeast	1.25	1.6	3.55	5.85	7.7	8.65	27	0.274074
L18	3	14-3x	2013-01-16	F	Low Yeast	1.35	1.7	3.9	6.25	8.05	8.75	27	0.274074
L19	9	14-3x	2013-01-16	M	Low Yeast	1.55	1.85	4.2	6.7	8.5	9.45	27	0.292593
L20	13	14-3x	2013-01-16	F	Low Yeast	1.35	1.7	3.55	6	8.05	9	27	0.283333
L25	10	31-2x	2013-01-15	M	Low Yeast	1.7	1.9	3.5	5.75	7.8	8.75	28	0.251786
L26	12	31-2x	2013-01-15	M	Low Yeast	1.65	2.05	3.85	6.05	8.25	9.35	28	0.275
L27	22	31-2x	2013-01-15	F	Low Yeast	1.35	2.05	3.85	6.25	8.75	9.9	28	0.305357
L28	33	31-2x	2013-01-15	F	Low Yeast	1.75	2	3.95	6.2	8.9	10.15	28	0.3
L33	7	222-2y	2013-01-15	M	Low Yeast	1.4	1.75	3.45	5.7	7.7	8.8	28	0.264286
L34	8	222-2y	2013-01-15	F	Low Yeast	1.5	1.9	3.5	5.3	6.75	7.9	28	0.228571
L35	14	222-2y	2013-01-15	F	Low Yeast	1.3	1.6	3.3	5.05	6.95	8.05	28	0.241071
L36	21	222-2y	2013-01-15	M	Low Yeast	1.7	2.1	4	6	8.45	9.65	28	0.283929
L41	15	278-4y	2013-01-15	M	Low Yeast	1.8	2.2	4.3	6.4	8.5	9.5	28	0.275
L42	16	278-4y	2013-01-15	F	Low Yeast	1.95	2.45	4.8	6.7	8.8	10.05	28	0.289286
L43	17	278-4y	2013-01-15	M	Low Yeast	2.4	2.75	4.95	7.2	9.45	10.55	28	0.291071
L44	18	278-4y	2013-01-15	M	Low Yeast	2	2.45	4.6	6.65	8.3	9.3	28	0.260714
L21	66	14-3x	2013-01-16	F	High Yeast	1.45	1.8	3.9	6.2	8.15	9.15	29	0.285185
L22	67	14-3x	2013-01-16	F	High Yeast	1.35	1.75	3.3	5.45	7.5	8.6	29	0.268519
L23	68	14-3x	2013-01-16	M	High Yeast	1.65	2	4	6.5	8.75	9.7	29	0.298148
L24	70	14-3x	2013-01-16	M	High Yeast	1.5	1.9	4	6.45	8.55	9.5	29	0.296296
L29	71	31-2x	2013-01-15	F	High Yeast	1.6	1.95	3.6	6.05	8.45	9.65	28	0.2875
L30	72	31-2x	2013-01-15	F	High Yeast	1.55	1.65	3.2	5	6.95	7.95	28	0.228571
L31	73	31-2x	2013-01-15	F	High Yeast	1.55	1.85	3.65	5.95	8.4	9.55	28	0.285714
L32	75	31-2x	2013-01-15	F	High Yeast	1.55	1.5	3.15	4.75	7.1	8.3	28	0.241071
L37	76	222-2y	2013-01-15	F	High Yeast	1.65	2.05	4.35	6.6	9.2	10.45	28	0.314286
L38	77	222-2y	2013-01-15	M	High Yeast	1.6	1.9	3.25	5.4	7.4	8.5	28	0.246429
L39	78	222-2y	2013-01-15	M	High Yeast	1.6	1.9	3.65	5.6	7.4	8.4	28	0.242857
L40	80	222-2y	2013-01-15	F	High Yeast	1.4	1.9	4	6.25	8.3	9.3	28	0.282143
L45	81	278-4y	2013-01-15	M	High Yeast	2	2.35	4.25	6.2	8.35	9.5	28	0.267857
L46	83	278-4y	2013-01-15	F	High Yeast	2	2.5	5.1	7.5	9.85	11.25	28	0.330357
L47	84	278-4y	2013-01-15	F	High Yeast	2.25	2.45	4.85	6.5	8.15	9.1	28	0.244643
L48	85	278-4y	2013-01-15	M	High Yeast	2.45	2.8	4.3	6.9	9.35	10.7	28	0.294643
