# Supplementary material for: Effect of live yeast Saccharomyces cerevisiae supplementation on the performance and cecum microbial profile of suckling piglets
Source: PLoS One. 2019 Jul 22;14(7):e0219557. doi: 10.1371/journal.pone.0219557 (PMC6645501; doi:10.1371/journal.pone.0219557)
Supplement: S2 Table — (XLSX) [file pone.0219557.s002.xlsx]

## Sheet: Foglio1
Pairwise association with ADG	OTU	Kingdom	Phylum	Class	Order	Family	Genus
-0.83854	798164	k__Bacteria	p__Firmicutes	c__Clostridia	o__Clostridiales	f__	g__
-0.824922	529258	k__Bacteria	p__Firmicutes	c__Clostridia	o__Clostridiales	f__	g__
-0.807277	New.CleanUp.ReferenceOTU19647	k__Bacteria	p__Firmicutes	c__Clostridia	o__Clostridiales	f__	g__
-0.792818	584951	k__Bacteria	p__Firmicutes	c__Clostridia	o__Clostridiales	f__Ruminococcaceae	g__
-0.782498	New.ReferenceOTU34	k__Bacteria	p__Firmicutes	c__Clostridia	o__Clostridiales	f__	g__
-0.742238	New.CleanUp.ReferenceOTU18677	k__Bacteria	p__Firmicutes	c__Clostridia	o__Clostridiales	f__	g__
-0.728797	303724	k__Bacteria	p__Firmicutes	c__Clostridia	o__Clostridiales	f__	g__
-0.711743	New.ReferenceOTU15	k__Bacteria	p__Firmicutes	c__Clostridia	o__Clostridiales	f__	g__
-0.705179	New.CleanUp.ReferenceOTU20757	k__Bacteria	p__Firmicutes	c__Clostridia	o__Clostridiales	f__Lachnospiraceae	g__
-0.698679	New.CleanUp.ReferenceOTU15128	k__Bacteria	p__Firmicutes	c__Clostridia	o__Clostridiales	NA	NA
-0.692828	339133	k__Bacteria	p__Firmicutes	c__Clostridia	o__Clostridiales	f__	g__
-0.681194	339221	k__Bacteria	p__Bacteroidetes	c__Bacteroidia	o__Bacteroidales	f__Prevotellaceae	g__Prevotella
-0.66577	New.CleanUp.ReferenceOTU24142	k__Bacteria	p__Bacteroidetes	c__Clostridia	o__Clostridiales	f__Ruminococcaceae	g__
-0.664287	327818	k__Bacteria	p__Bacteroidetes	c__Clostridia	o__Clostridiales	f__Ruminococcaceae	g__
-0.664287	353631	k__Bacteria	p__Bacteroidetes	c__Clostridia	o__Clostridiales	f__Ruminococcaceae	g__
-0.664287	527874	k__Bacteria	p__Bacteroidetes	c__Bacteroidia	o__Bacteroidales	f__Prevotellaceae	g__Prevotella
-0.663872	New.CleanUp.ReferenceOTU20187	k__Bacteria	p__Bacteroidetes	c__Clostridia	o__Clostridiales	NA	NA
-0.656258	New.CleanUp.ReferenceOTU23995	k__Bacteria	p__Bacteroidetes	c__Clostridia	o__Clostridiales	NA	NA
-0.655604	569017	k__Bacteria	p__Bacteroidetes	c__Clostridia	o__Clostridiales	NA	NA
-0.651991	332027	k__Bacteria	p__Bacteroidetes	c__Clostridia	o__Clostridiales	f__Christensenellaceae	g__
-0.649196	New.CleanUp.ReferenceOTU11627	k__Bacteria	p__Bacteroidetes	c__Clostridia	o__Clostridiales	f__	g__
-0.648937	New.CleanUp.ReferenceOTU1258	k__Bacteria	p__Bacteroidetes	c__Clostridia	o__Clostridiales	f__Ruminococcaceae	g__Ruminococcus
-0.646709	547854	k__Bacteria	p__Bacteroidetes	c__Bacteroidia	o__Bacteroidales	f__Prevotellaceae	g__Prevotella
-0.646409	New.CleanUp.ReferenceOTU10220	k__Bacteria	p__Bacteroidetes	c__Clostridia	o__Clostridiales	f__Lachnospiraceae	g__
-0.643361	New.CleanUp.ReferenceOTU9425	k__Bacteria	p__Bacteroidetes	c__Clostridia	o__Clostridiales	NA	NA
-0.639684	347511	k__Bacteria	p__Bacteroidetes	c__Clostridia	o__Clostridiales	f__	g__
-0.639488	178387	k__Bacteria	p__Bacteroidetes	c__Bacteroidia	o__Bacteroidales	f__Prevotellaceae	g__Prevotella
-0.639383	New.CleanUp.ReferenceOTU3200	k__Bacteria	p__Bacteroidetes	c__Bacteroidia	o__Bacteroidales	f__S24-7	g__
-0.638552	New.CleanUp.ReferenceOTU10950	k__Bacteria	p__Bacteroidetes	c__Clostridia	o__Clostridiales	f__Ruminococcaceae	g__
-0.637123	518748	k__Bacteria	p__Bacteroidetes	c__Clostridia	o__Clostridiales	NA	NA
-0.636961	334145	k__Bacteria	p__Bacteroidetes	c__Clostridia	o__Clostridiales	f__	g__
-0.635937	New.CleanUp.ReferenceOTU16500	k__Bacteria	p__Bacteroidetes	c__Clostridia	o__Clostridiales	f__	g__
-0.634256	313089	k__Bacteria	p__Bacteroidetes	c__Clostridia	o__Clostridiales	f__	g__
-0.633815	583256	k__Bacteria	p__Bacteroidetes	c__Clostridia	o__Clostridiales	f__Veillonellaceae	g__Anaerovibrio
-0.631572	20534	k__Bacteria	p__Bacteroidetes	c__Bacteroidia	o__Bacteroidales	f__[Paraprevotellaceae]	g__[Prevotella]
-0.631572	416215	k__Bacteria	p__Bacteroidetes	c__Clostridia	o__Clostridiales	f__	g__
-0.631572	552031	k__Bacteria	p__Bacteroidetes	c__Bacteroidia	o__Bacteroidales	f__	g__
-0.631572	792407	k__Bacteria	p__Bacteroidetes	c__Clostridia	o__Clostridiales	f__Christensenellaceae	g__
-0.631572	New.CleanUp.ReferenceOTU16864	k__Bacteria	p__Bacteroidetes	c__Clostridia	o__Clostridiales	f__Ruminococcaceae	g__
-0.631572	New.CleanUp.ReferenceOTU3033	k__Bacteria	p__Bacteroidetes	c__Clostridia	o__Clostridiales	f__	g__
-0.631381	New.CleanUp.ReferenceOTU20245	k__Bacteria	p__Bacteroidetes	c__Clostridia	o__Clostridiales	f__Ruminococcaceae	g__
-0.631381	New.CleanUp.ReferenceOTU22582	k__Bacteria	p__Bacteroidetes	c__Clostridia	o__Clostridiales	f__Ruminococcaceae	g__
-0.629802	373928	k__Bacteria	p__Bacteroidetes	c__Clostridia	o__Clostridiales	f__	g__
-0.629605	352215	k__Bacteria	p__Bacteroidetes	c__Clostridia	o__Clostridiales	f__Ruminococcaceae	g__
-0.628621	New.CleanUp.ReferenceOTU17833	k__Bacteria	p__Bacteroidetes	c__Clostridia	o__Clostridiales	f__Ruminococcaceae	g__Oscillospira
-0.628372	New.CleanUp.ReferenceOTU5701	k__Bacteria	p__Bacteroidetes	c__Clostridia	o__Clostridiales	f__	g__
-0.627319	1061134	k__Bacteria	p__Bacteroidetes	c__Bacteroidia	o__Bacteroidales	f__Prevotellaceae	g__Prevotella
-0.626263	41628	k__Bacteria	p__Bacteroidetes	c__Clostridia	o__Clostridiales	f__Ruminococcaceae	g__
-0.626042	333363	k__Bacteria	p__Bacteroidetes	c__Clostridia	o__Clostridiales	f__	g__
-0.624581	351823	k__Bacteria	p__Bacteroidetes	c__Clostridia	o__Clostridiales	f__	g__
-0.624229	870421	k__Bacteria	p__Bacteroidetes	c__Clostridia	o__Clostridiales	f__Ruminococcaceae	g__
-0.619304	New.CleanUp.ReferenceOTU2595	k__Bacteria	p__Bacteroidetes	c__Clostridia	o__Clostridiales	f__	g__
-0.618411	New.CleanUp.ReferenceOTU7042	k__Bacteria	p__Bacteroidetes	c__Bacteroidia	o__Bacteroidales	f__	g__
-0.617919	520075	k__Bacteria	p__Bacteroidetes	c__Bacteroidia	o__Bacteroidales	f__Porphyromonadaceae	g__Parabacteroides
-0.617919	New.CleanUp.ReferenceOTU12427	k__Bacteria	p__Bacteroidetes	c__Clostridia	o__Clostridiales	f__Ruminococcaceae	g__Oscillospira
-0.617784	529503	k__Bacteria	p__Bacteroidetes	c__Bacteroidia	o__Bacteroidales	f__Prevotellaceae	NA
-0.617353	New.CleanUp.ReferenceOTU12662	k__Bacteria	p__Bacteroidetes	c__Clostridia	o__Clostridiales	f__Clostridiaceae	g__
-0.617253	New.ReferenceOTU4	k__Bacteria	p__Bacteroidetes	c__Clostridia	o__Clostridiales	f__Ruminococcaceae	g__
-0.615513	New.CleanUp.ReferenceOTU15271	k__Bacteria	p__Bacteroidetes	c__Clostridia	o__Clostridiales	f__	g__
-0.615335	320121	k__Bacteria	p__Bacteroidetes	c__Clostridia	o__Clostridiales	f__	g__
-0.61509	New.CleanUp.ReferenceOTU15391	k__Bacteria	p__Bacteroidetes	c__Clostridia	o__Clostridiales	f__	g__
-0.614942	346374	k__Bacteria	p__Bacteroidetes	c__Clostridia	o__Clostridiales	f__	g__
-0.614706	287808	k__Bacteria	p__Bacteroidetes	c__Clostridia	o__Clostridiales	f__	g__
-0.614392	New.CleanUp.ReferenceOTU8396	k__Bacteria	p__Bacteroidetes	c__Clostridia	o__Clostridiales	f__	g__
-0.613271	New.CleanUp.ReferenceOTU10921	k__Bacteria	p__Bacteroidetes	c__Clostridia	o__Clostridiales	f__	g__
-0.612679	517344	k__Bacteria	p__Bacteroidetes	c__Clostridia	o__Clostridiales	f__Veillonellaceae	g__Anaerovibrio
-0.611773	New.CleanUp.ReferenceOTU4849	k__Bacteria	p__Bacteroidetes	c__Clostridia	o__Clostridiales	f__Ruminococcaceae	g__Ruminococcus
-0.611366	New.CleanUp.ReferenceOTU15592	k__Bacteria	p__Bacteroidetes	c__Clostridia	o__Clostridiales	f__Ruminococcaceae	g__
-0.605262	New.CleanUp.ReferenceOTU4819	k__Bacteria	p__Bacteroidetes	c__Clostridia	o__Clostridiales	f__	g__
-0.605254	365033	k__Bacteria	p__Bacteroidetes	c__Coriobacteriia	o__Coriobacteriales	f__Coriobacteriaceae	g__
-0.605043	New.CleanUp.ReferenceOTU8008	k__Bacteria	p__Bacteroidetes	c__Clostridia	o__Clostridiales	f__	g__
-0.604797	45365	k__Bacteria	p__Bacteroidetes	c__Clostridia	o__Clostridiales	NA	NA
-0.604012	557627	k__Bacteria	p__Bacteroidetes	c__Clostridia	o__Clostridiales	f__Clostridiaceae	g__
-0.602978	New.CleanUp.ReferenceOTU19701	k__Bacteria	p__Bacteroidetes	c__Clostridia	o__Clostridiales	f__	g__
-0.60073	347243	k__Bacteria	p__Bacteroidetes	c__Bacteroidia	o__Bacteroidales	f__Prevotellaceae	NA
-0.600399	355576	k__Bacteria	p__Bacteroidetes	c__Bacteroidia	o__Bacteroidales	f__Prevotellaceae	g__Prevotella
0	15368	k__Bacteria	p__Bacteroidetes	c__Bacilli	o__Lactobacillales	f__Streptococcaceae	g__Streptococcus
0	16512	k__Bacteria	p__Bacteroidetes	c__Clostridia	o__Clostridiales	f__	g__
0	22466	k__Bacteria	p__Bacteroidetes	c__Bacteroidia	o__Bacteroidales	f__Prevotellaceae	g__Prevotella
0	25695	k__Bacteria	p__Bacteroidetes	c__Clostridia	o__Clostridiales	f__Ruminococcaceae	g__
0	26978	k__Bacteria	p__Bacteroidetes	c__Clostridia	o__Clostridiales	f__Ruminococcaceae	g__
0	28970	k__Bacteria	p__Bacteroidetes	c__Bacteroidia	o__Bacteroidales	f__Prevotellaceae	g__Prevotella
0	28974	k__Bacteria	p__Bacteroidetes	c__Bacteroidia	o__Bacteroidales	f__Porphyromonadaceae	g__Parabacteroides
0	29495	k__Bacteria	p__Bacteroidetes	c__Clostridia	o__Clostridiales	f__Ruminococcaceae	g__
0	35260	k__Bacteria	p__Bacteroidetes	c__Clostridia	o__Clostridiales	f__Christensenellaceae	g__
0	36503	k__Bacteria	p__Bacteroidetes	c__Clostridia	o__Clostridiales	f__Ruminococcaceae	g__Oscillospira
0	36792	k__Bacteria	p__Bacteroidetes	c__Clostridia	o__Clostridiales	f__[Mogibacteriaceae]	g__
0	54730	k__Bacteria	p__Bacteroidetes	c__Erysipelotrichi	o__Erysipelotrichales	f__Erysipelotrichaceae	g__Bulleidia
0	68842	k__Bacteria	p__Bacteroidetes	c__Clostridia	o__Clostridiales	f__Lachnospiraceae	NA
0	76547	k__Bacteria	p__Bacteroidetes	c__Clostridia	o__Clostridiales	f__Clostridiaceae	g__
0	110192	k__Bacteria	p__Bacteroidetes	c__Clostridia	o__Clostridiales	f__Ruminococcaceae	g__Oscillospira
0	110221	k__Bacteria	p__Bacteroidetes	c__Clostridia	o__Clostridiales	f__Lachnospiraceae	g__[Ruminococcus]
0	113919	k__Bacteria	p__Bacteroidetes	c__Bacteroidia	o__Bacteroidales	f__S24-7	g__
0	131660	k__Bacteria	p__Bacteroidetes	c__Bacilli	o__Lactobacillales	f__Lactobacillaceae	g__Lactobacillus
0	133341	k__Bacteria	p__Bacteroidetes	c__Bacilli	o__Lactobacillales	f__Lactobacillaceae	g__Lactobacillus
0	134174	k__Bacteria	p__Bacteroidetes	c__Clostridia	o__Clostridiales	f__Ruminococcaceae	g__
0	137043	k__Bacteria	p__Bacteroidetes	c__Bacilli	o__Lactobacillales	f__Lactobacillaceae	g__Lactobacillus
0	151623	k__Bacteria	p__Bacteroidetes	c__Clostridia	o__Clostridiales	f__Veillonellaceae	g__Megasphaera
0	163433	k__Bacteria	p__Bacteroidetes	c__Bacteroidia	o__Bacteroidales	NA	NA
0	165935	k__Bacteria	p__Bacteroidetes	c__Clostridia	o__Clostridiales	f__Ruminococcaceae	g__
0	166689	k__Bacteria	p__Bacteroidetes	c__Clostridia	o__Clostridiales	f__Ruminococcaceae	g__
0	174755	k__Bacteria	p__Bacteroidetes	c__Coriobacteriia	o__Coriobacteriales	f__Coriobacteriaceae	g__Collinsella
0	177704	k__Bacteria	p__Bacteroidetes	c__Clostridia	o__Clostridiales	f__	g__
0	178712	k__Bacteria	p__Bacteroidetes	c__Clostridia	o__Clostridiales	f__	g__
0	178843	k__Bacteria	p__Bacteroidetes	c__Clostridia	o__Clostridiales	f__Ruminococcaceae	g__
0	179557	k__Bacteria	p__Bacteroidetes	c__Clostridia	o__Clostridiales	f__Ruminococcaceae	g__
0	180421	k__Bacteria	p__Bacteroidetes	c__Bacteroidia	o__Bacteroidales	f__Bacteroidaceae	g__Bacteroides
0	180450	k__Bacteria	p__Bacteroidetes	c__Clostridia	o__Clostridiales	NA	NA
0	181204	k__Bacteria	p__Bacteroidetes	c__Clostridia	o__Clostridiales	f__Ruminococcaceae	g__
0	183715	k__Bacteria	p__Bacteroidetes	c__Clostridia	o__Clostridiales	f__Ruminococcaceae	g__
0	183720	k__Bacteria	p__Bacteroidetes	c__Clostridia	o__Clostridiales	f__Ruminococcaceae	g__
0	183829	k__Bacteria	p__Bacteroidetes	c__Clostridia	o__Clostridiales	NA	NA
0	184651	k__Bacteria	p__Bacteroidetes	c__Clostridia	o__Clostridiales	f__	g__
0	184725	k__Bacteria	p__Bacteroidetes	c__Bacteroidia	o__Bacteroidales	f__Rikenellaceae	g__
0	184745	k__Bacteria	p__Bacteroidetes	c__Coriobacteriia	o__Coriobacteriales	f__Coriobacteriaceae	g__Collinsella
0	185394	k__Bacteria	p__Bacteroidetes	c__Clostridia	o__Clostridiales	f__Lachnospiraceae	NA
0	186062	k__Bacteria	p__Bacteroidetes	c__Clostridia	o__Clostridiales	f__Ruminococcaceae	g__
0	186352	k__Bacteria	p__Bacteroidetes	c__Bacteroidia	o__Bacteroidales	f__Bacteroidaceae	g__Bacteroides
0	188271	k__Bacteria	p__Bacteroidetes	c__Clostridia	o__Clostridiales	f__Clostridiaceae	g__
0	189294	k__Bacteria	p__Bacteroidetes	c__Coriobacteriia	o__Coriobacteriales	f__Coriobacteriaceae	g__Collinsella
0	190453	k__Bacteria	p__Bacteroidetes	c__Clostridia	o__Clostridiales	f__Ruminococcaceae	g__
0	190815	k__Bacteria	p__Bacteroidetes	c__Bacteroidia	o__Bacteroidales	f__Porphyromonadaceae	g__Parabacteroides
0	191108	k__Bacteria	p__Bacteroidetes	c__Clostridia	o__Clostridiales	f__Lachnospiraceae	g__[Ruminococcus]
0	193098	k__Bacteria	p__Bacteroidetes	c__Clostridia	o__Clostridiales	f__Ruminococcaceae	g__
0	193968	k__Bacteria	p__Bacteroidetes	c__Clostridia	o__Clostridiales	f__Ruminococcaceae	g__
0	194236	k__Bacteria	p__Bacteroidetes	c__Clostridia	o__Clostridiales	f__Ruminococcaceae	g__Oscillospira
0	194258	k__Bacteria	p__Bacteroidetes	c__Clostridia	o__Clostridiales	f__Ruminococcaceae	g__
0	194373	k__Bacteria	p__Bacteroidetes	c__Clostridia	o__Clostridiales	f__Ruminococcaceae	g__
0	194425	k__Bacteria	p__Bacteroidetes	c__Clostridia	o__Clostridiales	f__Ruminococcaceae	g__Oscillospira
0	197179	k__Bacteria	p__Bacteroidetes	c__Clostridia	o__Clostridiales	f__Ruminococcaceae	g__
0	198210	k__Bacteria	p__Bacteroidetes	c__Clostridia	o__Clostridiales	f__Ruminococcaceae	NA
0	199368	k__Bacteria	p__Bacteroidetes	c__Clostridia	o__Clostridiales	f__Ruminococcaceae	NA
0	211191	k__Bacteria	p__Bacteroidetes	c__Clostridia	o__Clostridiales	f__Ruminococcaceae	g__
0	214036	k__Bacteria	p__Bacteroidetes	c__Clostridia	o__Clostridiales	f__[Mogibacteriaceae]	g__
0	215507	k__Bacteria	p__Bacteroidetes	c__Clostridia	o__Clostridiales	f__Ruminococcaceae	g__Oscillospira
0	223059	k__Bacteria	p__Bacteroidetes	c__Clostridia	o__Clostridiales	f__Ruminococcaceae	g__Ruminococcus
0	230263	k__Bacteria	p__Bacteroidetes	c__Erysipelotrichi	o__Erysipelotrichales	f__Erysipelotrichaceae	g__p-75-a5
0	234314	k__Bacteria	p__Bacteroidetes	c__Clostridia	o__Clostridiales	f__	g__
0	235212	k__Bacteria	p__Bacteroidetes	c__Clostridia	o__Clostridiales	f__Ruminococcaceae	g__
0	247557	k__Bacteria	p__Bacteroidetes	c__Clostridia	o__Clostridiales	f__Ruminococcaceae	g__Oscillospira
0	261240	k__Bacteria	p__Bacteroidetes	c__Bacteroidia	o__Bacteroidales	f__Prevotellaceae	g__Prevotella
0	270030	k__Bacteria	p__Bacteroidetes	c__Clostridia	o__Clostridiales	f__Ruminococcaceae	g__Ruminococcus
0	276149	k__Bacteria	p__Bacteroidetes	c__Bacteroidia	o__Bacteroidales	f__Porphyromonadaceae	g__Parabacteroides
0	287514	k__Bacteria	p__Bacteroidetes	c__Coriobacteriia	o__Coriobacteriales	f__Coriobacteriaceae	g__Collinsella
0	287798	k__Bacteria	p__Bacteroidetes	c__Erysipelotrichi	o__Erysipelotrichales	f__Erysipelotrichaceae	g__
0	291094	k__Bacteria	p__Bacteroidetes	c__Clostridia	o__Clostridiales	f__Ruminococcaceae	g__
0	291571	k__Bacteria	p__Bacteroidetes	c__Clostridia	o__Clostridiales	f__Ruminococcaceae	g__Oscillospira
0	291733	k__Bacteria	p__Bacteroidetes	c__Clostridia	o__Clostridiales	f__	g__
0	291963	k__Bacteria	p__Bacteroidetes	c__Clostridia	o__Clostridiales	f__Ruminococcaceae	g__
0	292057	k__Bacteria	p__Bacteroidetes	c__Bacilli	o__Lactobacillales	f__Lactobacillaceae	g__Lactobacillus
0	292315	k__Bacteria	p__Bacteroidetes	c__Bacteroidia	o__Bacteroidales	f__	g__
0	294219	k__Bacteria	p__Bacteroidetes	c__Clostridia	o__Clostridiales	f__Lachnospiraceae	g__[Ruminococcus]
0	294324	k__Bacteria	p__Bacteroidetes	c__Clostridia	o__Clostridiales	f__Eubacteriaceae	g__Pseudoramibacter_Eubacterium
0	295100	k__Bacteria	p__Bacteroidetes	c__Clostridia	o__Clostridiales	f__Christensenellaceae	g__
0	295194	k__Bacteria	p__Bacteroidetes	c__Erysipelotrichi	o__Erysipelotrichales	f__Erysipelotrichaceae	g__Catenibacterium
0	295554	k__Bacteria	p__Bacteroidetes	c__Bacteroidia	o__Bacteroidales	f__Prevotellaceae	g__Prevotella
0	295705	k__Bacteria	p__Bacteroidetes	c__Erysipelotrichi	o__Erysipelotrichales	f__Erysipelotrichaceae	g__Catenibacterium
0	296340	k__Bacteria	p__Bacteroidetes	c__Bacteroidia	o__Bacteroidales	f__S24-7	g__
0	296941	k__Bacteria	p__Bacteroidetes	c__Clostridia	o__Clostridiales	f__Ruminococcaceae	g__
0	299151	k__Bacteria	p__Bacteroidetes	c__Bacilli	o__Lactobacillales	f__Streptococcaceae	g__Streptococcus
0	299382	k__Bacteria	p__Bacteroidetes	c__Bacteroidia	o__Bacteroidales	f__Prevotellaceae	g__Prevotella
0	299830	k__Bacteria	p__Bacteroidetes	c__Bacteroidia	o__Bacteroidales	f__Prevotellaceae	g__Prevotella
0	300820	k__Bacteria	p__Bacteroidetes	c__Erysipelotrichi	o__Erysipelotrichales	f__Erysipelotrichaceae	g__
0	300853	k__Bacteria	p__Bacteroidetes	c__Bacteroidia	o__Bacteroidales	f__[Paraprevotellaceae]	g__CF231
0	302909	k__Bacteria	p__Bacteroidetes	c__Clostridia	o__Clostridiales	f__Lachnospiraceae	g__
0	303221	k__Bacteria	p__Bacteroidetes	c__Erysipelotrichi	o__Erysipelotrichales	f__Erysipelotrichaceae	g__Catenibacterium
0	304161	k__Bacteria	p__Bacteroidetes	c__Clostridia	o__Clostridiales	f__Ruminococcaceae	g__
0	305187	k__Bacteria	p__Bacteroidetes	c__Clostridia	o__Clostridiales	f__	g__
0	305288	k__Bacteria	p__Bacteroidetes	c__Clostridia	o__Clostridiales	f__Clostridiaceae	g__Clostridium
0	306695	k__Bacteria	p__Bacteroidetes	c__Bacteroidia	o__Bacteroidales	f__S24-7	g__
0	308249	k__Bacteria	p__Bacteroidetes	c__Bacilli	o__Lactobacillales	f__Lactobacillaceae	g__Lactobacillus
0	308631	k__Bacteria	p__Bacteroidetes	c__Clostridia	o__Clostridiales	f__	g__
0	308912	k__Bacteria	p__Bacteroidetes	c__Clostridia	o__Clostridiales	f__Christensenellaceae	g__
0	310178	k__Bacteria	p__Bacteroidetes	c__Clostridia	o__Clostridiales	f__Christensenellaceae	g__
0	312628	k__Bacteria	p__Bacteroidetes	c__Clostridia	o__Clostridiales	f__Ruminococcaceae	g__
0	313524	k__Bacteria	p__Bacteroidetes	c__Clostridia	o__Clostridiales	f__Ruminococcaceae	g__
0	314204	k__Bacteria	p__Bacteroidetes	c__Clostridia	o__Clostridiales	f__Clostridiaceae	g__
0	314613	k__Bacteria	p__Bacteroidetes	c__Bacteroidia	o__Bacteroidales	f__Prevotellaceae	g__Prevotella
0	317515	k__Bacteria	p__Bacteroidetes	c__Clostridia	o__Clostridiales	f__	g__
0	322258	k__Bacteria	p__Bacteroidetes	c__Clostridia	o__Clostridiales	f__Ruminococcaceae	g__
0	322798	k__Bacteria	p__Bacteroidetes	c__Clostridia	o__Clostridiales	f__Clostridiaceae	g__SMB53
0	322895	k__Bacteria	p__Bacteroidetes	c__Clostridia	o__Clostridiales	f__Ruminococcaceae	g__
0	323200	k__Bacteria	p__Bacteroidetes	c__Erysipelotrichi	o__Erysipelotrichales	f__Erysipelotrichaceae	g__p-75-a5
0	324283	k__Bacteria	p__Bacteroidetes	c__Bacteroidia	o__Bacteroidales	f__Prevotellaceae	g__Prevotella
0	325254	k__Bacteria	p__Bacteroidetes	c__Clostridia	o__Clostridiales	f__Christensenellaceae	g__
0	325437	k__Bacteria	p__Bacteroidetes	c__Clostridia	o__Clostridiales	f__Ruminococcaceae	g__
0	328257	k__Bacteria	p__Bacteroidetes	c__Clostridia	o__Clostridiales	f__Dehalobacteriaceae	g__
0	328283	k__Bacteria	p__Bacteroidetes	c__Bacilli	o__Lactobacillales	f__Streptococcaceae	g__Streptococcus
0	328717	k__Bacteria	p__Bacteroidetes	c__Clostridia	o__Clostridiales	f__Lachnospiraceae	g__Blautia
0	329073	k__Bacteria	p__Bacteroidetes	c__Clostridia	o__Clostridiales	f__Clostridiaceae	g__
0	329693	k__Bacteria	p__Bacteroidetes	c__Bacteroidia	o__Bacteroidales	f__Prevotellaceae	g__Prevotella
0	330451	k__Bacteria	p__Bacteroidetes	c__Clostridia	o__Clostridiales	f__Ruminococcaceae	g__
0	331103	k__Bacteria	p__Bacteroidetes	c__Clostridia	o__Clostridiales	f__Ruminococcaceae	g__Oscillospira
0	331411	k__Bacteria	p__Bacteroidetes	c__Clostridia	o__Clostridiales	f__	g__
0	332527	k__Bacteria	p__Bacteroidetes	c__Bacteroidia	o__Bacteroidales	f__	g__
0	332831	k__Bacteria	p__Bacteroidetes	c__Clostridia	o__Clostridiales	f__Ruminococcaceae	g__
0	332901	k__Bacteria	p__Bacteroidetes	c__Clostridia	o__Clostridiales	f__	g__
0	335041	k__Bacteria	p__Bacteroidetes	c__Clostridia	o__Clostridiales	f__Ruminococcaceae	g__
0	336325	k__Bacteria	p__Bacteroidetes	c__Clostridia	o__Clostridiales	f__Peptostreptococcaceae	g__
0	337010	k__Bacteria	p__Bacteroidetes	c__Clostridia	o__Clostridiales	f__Ruminococcaceae	g__
0	337379	k__Bacteria	p__Bacteroidetes	c__Clostridia	o__Clostridiales	f__Clostridiaceae	g__
0	338145	k__Bacteria	p__Bacteroidetes	c__Coriobacteriia	o__Coriobacteriales	f__Coriobacteriaceae	g__
0	338757	k__Bacteria	p__Bacteroidetes	c__Bacilli	o__Lactobacillales	f__Lactobacillaceae	g__Lactobacillus
0	338957	k__Bacteria	p__Bacteroidetes	c__Clostridia	o__Clostridiales	f__Peptostreptococcaceae	NA
0	341134	k__Bacteria	p__Bacteroidetes	c__Clostridia	o__Clostridiales	f__Clostridiaceae	g__SMB53
0	341221	k__Bacteria	p__Bacteroidetes	c__Clostridia	o__Clostridiales	f__Ruminococcaceae	g__
0	341777	k__Bacteria	p__Bacteroidetes	c__Clostridia	o__Clostridiales	f__Ruminococcaceae	g__Oscillospira
0	341953	k__Bacteria	p__Bacteroidetes	c__Clostridia	o__Clostridiales	f__Ruminococcaceae	g__
0	341969	k__Bacteria	p__Bacteroidetes	c__Clostridia	o__Clostridiales	f__Ruminococcaceae	g__Oscillospira
0	342638	k__Bacteria	p__Bacteroidetes	c__Bacteroidia	o__Bacteroidales	f__Prevotellaceae	g__Prevotella
0	343433	k__Bacteria	p__Bacteroidetes	c__Bacteroidia	o__Bacteroidales	f__Porphyromonadaceae	g__Parabacteroides
0	345454	k__Bacteria	p__Bacteroidetes	c__Clostridia	o__Clostridiales	f__Clostridiaceae	NA
0	345944	k__Bacteria	p__Bacteroidetes	c__Clostridia	o__Clostridiales	f__Christensenellaceae	g__
0	347367	k__Bacteria	p__Bacteroidetes	c__Bacilli	o__Lactobacillales	f__Lactobacillaceae	g__Lactobacillus
0	347714	k__Bacteria	p__Bacteroidetes	c__Clostridia	o__Clostridiales	f__Clostridiaceae	g__
0	348863	k__Bacteria	p__Bacteroidetes	c__Clostridia	o__Clostridiales	f__Lachnospiraceae	g__Coprococcus
0	350036	k__Bacteria	p__Bacteroidetes	c__Clostridia	o__Clostridiales	f__Ruminococcaceae	g__
0	350071	k__Bacteria	p__Bacteroidetes	c__Bacteroidia	o__Bacteroidales	NA	NA
0	350398	k__Bacteria	p__Bacteroidetes	c__Clostridia	o__Clostridiales	f__Ruminococcaceae	g__
0	351027	k__Bacteria	p__Bacteroidetes	c__Clostridia	o__Clostridiales	f__	g__
0	351357	k__Bacteria	p__Bacteroidetes	c__Clostridia	o__Clostridiales	f__Clostridiaceae	g__SMB53
0	351927	k__Bacteria	p__Bacteroidetes	c__Clostridia	o__Clostridiales	f__Ruminococcaceae	g__
0	352081	k__Bacteria	p__Bacteroidetes	c__Clostridia	o__Clostridiales	f__Ruminococcaceae	g__
0	353195	k__Bacteria	p__Bacteroidetes	c__Clostridia	o__Clostridiales	f__	g__
0	353561	k__Bacteria	p__Bacteroidetes	c__Clostridia	o__Clostridiales	f__	g__
0	353817	k__Bacteria	p__Bacteroidetes	c__Clostridia	o__Clostridiales	f__Ruminococcaceae	g__
0	359720	k__Bacteria	p__Bacteroidetes	c__Clostridia	o__Clostridiales	f__Ruminococcaceae	g__
0	359721	k__Bacteria	p__Bacteroidetes	c__Coriobacteriia	o__Coriobacteriales	f__Coriobacteriaceae	g__Collinsella
0	360158	k__Bacteria	p__Bacteroidetes	c__Clostridia	o__Clostridiales	f__Lachnospiraceae	NA
0	360717	k__Bacteria	p__Bacteroidetes	c__Clostridia	o__Clostridiales	f__Lachnospiraceae	g__Blautia
0	360808	k__Bacteria	p__Bacteroidetes	c__Clostridia	o__Clostridiales	f__Ruminococcaceae	g__
0	361398	k__Bacteria	p__Bacteroidetes	c__Clostridia	o__Clostridiales	f__Ruminococcaceae	g__Oscillospira
0	363017	k__Bacteria	p__Bacteroidetes	c__Clostridia	o__Clostridiales	f__Ruminococcaceae	g__
0	363794	k__Bacteria	p__Bacteroidetes	c__Coriobacteriia	o__Coriobacteriales	f__Coriobacteriaceae	g__Collinsella
0	364563	k__Bacteria	p__Bacteroidetes	c__Clostridia	o__Clostridiales	f__Ruminococcaceae	g__
0	364753	k__Bacteria	p__Bacteroidetes	c__Clostridia	o__Clostridiales	f__Lachnospiraceae	g__Anaerostipes
0	365220	k__Bacteria	p__Bacteroidetes	c__Clostridia	o__Clostridiales	f__Ruminococcaceae	g__
0	365933	k__Bacteria	p__Bacteroidetes	c__Coriobacteriia	o__Coriobacteriales	f__Coriobacteriaceae	g__Collinsella
0	365965	k__Bacteria	p__Bacteroidetes	c__Clostridia	o__Clostridiales	f__Ruminococcaceae	g__Ruminococcus
0	366392	k__Bacteria	p__Bacteroidetes	c__Coriobacteriia	o__Coriobacteriales	f__Coriobacteriaceae	g__
0	366584	k__Bacteria	p__Bacteroidetes	c__Clostridia	o__Clostridiales	f__Ruminococcaceae	g__
0	367217	k__Bacteria	p__Bacteroidetes	c__Clostridia	o__Clostridiales	f__Ruminococcaceae	g__
0	367232	k__Bacteria	p__Bacteroidetes	c__Clostridia	o__Clostridiales	f__Ruminococcaceae	g__Faecalibacterium
0	367627	k__Bacteria	p__Bacteroidetes	c__Erysipelotrichi	o__Erysipelotrichales	f__Erysipelotrichaceae	g__Catenibacterium
0	368117	k__Bacteria	p__Bacteroidetes	c__Clostridia	o__Clostridiales	f__Ruminococcaceae	g__
0	368175	k__Bacteria	p__Bacteroidetes	c__Coriobacteriia	o__Coriobacteriales	f__Coriobacteriaceae	g__Collinsella
0	368681	k__Bacteria	p__Bacteroidetes	c__Bacteroidia	o__Bacteroidales	f__Prevotellaceae	g__Prevotella
0	370086	k__Bacteria	p__Bacteroidetes	c__Clostridia	o__Clostridiales	f__Ruminococcaceae	g__
0	370154	k__Bacteria	p__Bacteroidetes	c__Clostridia	o__Clostridiales	f__Ruminococcaceae	g__
0	374863	k__Bacteria	p__Bacteroidetes	c__Bacilli	o__Lactobacillales	f__Lactobacillaceae	g__Lactobacillus
0	383885	k__Bacteria	p__Bacteroidetes	c__Bacilli	o__Lactobacillales	f__Lactobacillaceae	g__Lactobacillus
0	409732	k__Bacteria	p__Bacteroidetes	c__Clostridia	o__Clostridiales	f__Lachnospiraceae	g__Blautia
0	409786	k__Bacteria	p__Bacteroidetes	c__Clostridia	o__Clostridiales	f__Lachnospiraceae	NA
0	411486	k__Bacteria	p__Bacteroidetes	c__Bacilli	o__Lactobacillales	f__Lactobacillaceae	g__Lactobacillus
0	433676	k__Bacteria	p__Bacteroidetes	c__Bacilli	o__Lactobacillales	f__Lactobacillaceae	g__Lactobacillus
0	463794	k__Bacteria	p__Bacteroidetes	c__Bacilli	o__Lactobacillales	f__Lactobacillaceae	g__Lactobacillus
0	512494	k__Bacteria	p__Bacteroidetes	c__Clostridia	o__Clostridiales	f__Veillonellaceae	g__Phascolarctobacterium
0	513664	k__Bacteria	p__Bacteroidetes	c__Bacteroidia	o__Bacteroidales	f__Prevotellaceae	g__Prevotella
0	514086	k__Bacteria	p__Bacteroidetes	c__Clostridia	o__Clostridiales	f__Lachnospiraceae	g__Blautia
0	514988	k__Bacteria	p__Bacteroidetes	c__Clostridia	o__Clostridiales	f__Clostridiaceae	NA
0	517293	k__Bacteria	p__Bacteroidetes	c__Bacteroidia	o__Bacteroidales	f__S24-7	g__
0	520720	k__Bacteria	p__Bacteroidetes	c__Clostridia	o__Clostridiales	f__Ruminococcaceae	g__Oscillospira
0	522591	k__Bacteria	p__Bacteroidetes	c__Bacteroidia	o__Bacteroidales	f__S24-7	g__
0	522921	k__Bacteria	p__Bacteroidetes	c__Clostridia	o__Clostridiales	f__	g__
0	523782	k__Bacteria	p__Bacteroidetes	c__Clostridia	o__Clostridiales	f__Lachnospiraceae	g__Coprococcus
0	524044	k__Bacteria	p__Bacteroidetes	c__Bacteroidia	o__Bacteroidales	f__S24-7	g__
0	524219	k__Bacteria	p__Bacteroidetes	c__Clostridia	o__Clostridiales	NA	NA
0	524842	k__Bacteria	p__Bacteroidetes	c__Clostridia	o__Clostridiales	f__Clostridiaceae	g__
0	524884	k__Bacteria	p__Bacteroidetes	c__Erysipelotrichi	o__Erysipelotrichales	f__Erysipelotrichaceae	g__[Eubacterium]
0	525378	k__Bacteria	p__Bacteroidetes	c__Clostridia	o__Clostridiales	f__Lachnospiraceae	g__Blautia
0	526773	k__Bacteria	p__Bacteroidetes	c__Clostridia	o__Clostridiales	f__Lachnospiraceae	g__Blautia
0	527208	k__Bacteria	p__Bacteroidetes	c__Erysipelotrichi	o__Erysipelotrichales	f__Erysipelotrichaceae	g__[Eubacterium]
0	528606	k__Bacteria	p__Bacteroidetes	c__Clostridia	o__Clostridiales	f__Lachnospiraceae	NA
0	528653	k__Bacteria	p__Bacteroidetes	c__Bacteroidia	o__Bacteroidales	f__Porphyromonadaceae	g__Parabacteroides
0	530319	k__Bacteria	p__Bacteroidetes	c__Bacteroidia	o__Bacteroidales	f__Prevotellaceae	g__Prevotella
0	530653	k__Bacteria	p__Bacteroidetes	c__Bacteroidia	o__Bacteroidales	f__Prevotellaceae	g__Prevotella
0	530700	k__Bacteria	p__Bacteroidetes	c__Clostridia	o__Clostridiales	f__Lachnospiraceae	g__
0	530854	k__Bacteria	p__Bacteroidetes	c__Bacteroidia	o__Bacteroidales	f__Prevotellaceae	g__Prevotella
0	530947	k__Bacteria	p__Bacteroidetes	c__Bacteroidia	o__Bacteroidales	f__S24-7	g__
0	531046	k__Bacteria	p__Bacteroidetes	c__Bacteroidia	o__Bacteroidales	f__Prevotellaceae	g__Prevotella
0	533624	k__Bacteria	p__Bacteroidetes	c__Erysipelotrichi	o__Erysipelotrichales	f__Erysipelotrichaceae	g__Sharpea
0	536535	k__Bacteria	p__Bacteroidetes	c__Clostridia	o__Clostridiales	f__	g__
0	538322	k__Bacteria	p__Bacteroidetes	c__Clostridia	o__Clostridiales	f__Ruminococcaceae	g__
0	542126	k__Bacteria	p__Bacteroidetes	c__Clostridia	o__Clostridiales	f__Ruminococcaceae	g__
0	546876	k__Bacteria	p__Bacteroidetes	c__Clostridia	o__Clostridiales	f__Lachnospiraceae	g__Blautia
0	548233	k__Bacteria	p__Bacteroidetes	c__Clostridia	o__Clostridiales	f__Clostridiaceae	g__
0	549756	k__Bacteria	p__Bacteroidetes	c__Bacilli	o__Lactobacillales	f__Lactobacillaceae	g__Lactobacillus
0	551419	k__Bacteria	p__Bacteroidetes	c__Clostridia	o__Clostridiales	f__Ruminococcaceae	g__
0	552621	k__Bacteria	p__Bacteroidetes	c__Erysipelotrichi	o__Erysipelotrichales	f__Erysipelotrichaceae	g__L7A_E11
0	552988	k__Bacteria	p__Bacteroidetes	c__Clostridia	o__Clostridiales	f__	g__
0	553080	k__Bacteria	p__Bacteroidetes	c__Clostridia	o__Clostridiales	f__Ruminococcaceae	g__
0	553228	k__Bacteria	p__Bacteroidetes	c__Erysipelotrichi	o__Erysipelotrichales	f__Erysipelotrichaceae	g__Bulleidia
0	554303	k__Bacteria	p__Bacteroidetes	c__Clostridia	o__Clostridiales	f__Lachnospiraceae	g__
0	555945	k__Bacteria	p__Bacteroidetes	c__Clostridia	o__Clostridiales	f__Clostridiaceae	g__
0	556835	k__Bacteria	p__Bacteroidetes	c__Clostridia	o__Clostridiales	f__Veillonellaceae	g__Phascolarctobacterium
0	560502	k__Bacteria	p__Bacteroidetes	c__Clostridia	o__Clostridiales	f__	g__
0	564806	k__Bacteria	p__Bacteroidetes	c__Clostridia	o__Clostridiales	f__	g__
0	568118	k__Bacteria	p__Bacteroidetes	c__Bacteroidia	o__Bacteroidales	f__Prevotellaceae	g__Prevotella
0	570243	k__Bacteria	p__Bacteroidetes	c__Bacteroidia	o__Bacteroidales	NA	NA
0	574122	k__Bacteria	p__Bacteroidetes	c__Clostridia	o__Clostridiales	f__Ruminococcaceae	g__Oscillospira
0	576400	k__Bacteria	p__Bacteroidetes	c__Clostridia	o__Clostridiales	f__	g__
0	577228	k__Bacteria	p__Bacteroidetes	c__Bacteroidia	o__Bacteroidales	f__S24-7	g__
0	578016	k__Bacteria	p__Bacteroidetes	c__Bacteroidia	o__Bacteroidales	f__Porphyromonadaceae	g__Parabacteroides
0	580421	k__Bacteria	p__Bacteroidetes	c__Clostridia	o__Clostridiales	f__Veillonellaceae	g__Phascolarctobacterium
0	580629	k__Bacteria	p__Bacteroidetes	c__Bacteroidia	o__Bacteroidales	f__Bacteroidaceae	g__Bacteroides
0	581658	k__Bacteria	p__Bacteroidetes	c__Clostridia	o__Clostridiales	f__	g__
0	583572	k__Bacteria	p__Bacteroidetes	c__Clostridia	o__Clostridiales	f__Ruminococcaceae	g__
0	584484	k__Bacteria	p__Bacteroidetes	c__Bacteroidia	o__Bacteroidales	f__Prevotellaceae	g__Prevotella
0	584571	k__Bacteria	p__Bacteroidetes	c__Bacilli	o__Lactobacillales	f__Lactobacillaceae	g__Lactobacillus
0	584978	k__Bacteria	p__Bacteroidetes	c__Clostridia	o__Clostridiales	f__Ruminococcaceae	g__Ruminococcus
0	585480	k__Bacteria	p__Bacteroidetes	c__Clostridia	o__Clostridiales	f__Lachnospiraceae	g__Anaerostipes
0	585914	k__Bacteria	p__Bacteroidetes	c__Bacteroidia	o__Bacteroidales	f__Bacteroidaceae	g__Bacteroides
0	586141	k__Bacteria	p__Bacteroidetes	c__Bacilli	o__Lactobacillales	f__Lactobacillaceae	g__Lactobacillus
0	589329	k__Bacteria	p__Bacteroidetes	c__Bacteroidia	o__Bacteroidales	f__Prevotellaceae	g__Prevotella
0	591671	k__Bacteria	p__Bacteroidetes	c__Clostridia	o__Clostridiales	f__Lachnospiraceae	g__Dorea
0	591785	k__Bacteria	p__Bacteroidetes	c__Bacteroidia	o__Bacteroidales	f__Prevotellaceae	g__Prevotella
0	592925	k__Bacteria	p__Bacteroidetes	c__Bacteroidia	o__Bacteroidales	f__Prevotellaceae	g__Prevotella
0	605577	k__Bacteria	p__Bacteroidetes	c__Erysipelotrichi	o__Erysipelotrichales	f__Erysipelotrichaceae	g__p-75-a5
0	618906	k__Bacteria	p__Bacteroidetes	c__Erysipelotrichi	o__Erysipelotrichales	f__Erysipelotrichaceae	g__p-75-a5
0	619919	k__Bacteria	p__Bacteroidetes	c__Clostridia	o__Clostridiales	f__	g__
0	644244	k__Bacteria	p__Bacteroidetes	c__Clostridia	o__Clostridiales	f__Christensenellaceae	g__
0	646411	k__Bacteria	p__Bacteroidetes	c__Erysipelotrichi	o__Erysipelotrichales	f__Erysipelotrichaceae	g__Bulleidia
0	668257	k__Bacteria	p__Bacteroidetes	c__Clostridia	o__Clostridiales	f__	g__
0	697548	k__Bacteria	p__Bacteroidetes	c__Clostridia	o__Clostridiales	f__Ruminococcaceae	g__
0	708190	k__Bacteria	p__Bacteroidetes	c__Clostridia	o__Clostridiales	f__Ruminococcaceae	g__Oscillospira
0	711099	k__Bacteria	p__Bacteroidetes	c__Clostridia	o__Clostridiales	f__Lachnospiraceae	g__
0	733799	k__Bacteria	p__Bacteroidetes	c__Bacteroidia	o__Bacteroidales	f__	g__
0	753891	k__Bacteria	p__Bacteroidetes	c__Clostridia	o__Clostridiales	f__Lachnospiraceae	g__
0	780650	k__Bacteria	p__Bacteroidetes	c__Clostridia	o__Clostridiales	f__Clostridiaceae	g__
0	799573	k__Bacteria	p__Bacteroidetes	c__Clostridia	o__Clostridiales	NA	NA
0	804995	k__Bacteria	p__Bacteroidetes	c__Bacteroidia	o__Bacteroidales	f__S24-7	g__
0	810847	k__Bacteria	p__Bacteroidetes	c__Clostridia	o__Clostridiales	f__	g__
0	811513	k__Bacteria	p__Bacteroidetes	c__Clostridia	o__Clostridiales	f__[Mogibacteriaceae]	g__
0	811544	k__Bacteria	p__Bacteroidetes	c__Bacilli	o__Lactobacillales	f__Lactobacillaceae	g__Lactobacillus
0	817140	k__Bacteria	p__Bacteroidetes	c__Clostridia	o__Clostridiales	f__Veillonellaceae	g__Megasphaera
0	819676	k__Bacteria	p__Bacteroidetes	c__Bacilli	o__Lactobacillales	f__Lactobacillaceae	g__Lactobacillus
0	840914	k__Bacteria	p__Bacteroidetes	c__Bacteroidia	o__Bacteroidales	f__Prevotellaceae	g__Prevotella
0	843459	k__Bacteria	p__Bacteroidetes	c__Clostridia	o__Clostridiales	f__Clostridiaceae	g__
0	847728	k__Bacteria	p__Bacteroidetes	c__Clostridia	o__Clostridiales	f__Ruminococcaceae	g__Ruminococcus
0	875643	k__Bacteria	p__Bacteroidetes	c__Bacteroidia	o__Bacteroidales	f__[Paraprevotellaceae]	g__CF231
0	882782	k__Bacteria	p__Bacteroidetes	c__Bacteroidia	o__Bacteroidales	f__S24-7	g__
0	907916	k__Bacteria	p__Bacteroidetes	c__Bacteroidia	o__Bacteroidales	f__	g__
0	916143	k__Bacteria	p__Bacteroidetes	c__Clostridia	o__Clostridiales	f__Veillonellaceae	g__Phascolarctobacterium
0	918187	k__Bacteria	p__Bacteroidetes	c__Bacteroidia	o__Bacteroidales	f__Porphyromonadaceae	g__Parabacteroides
0	921813	k__Bacteria	p__Bacteroidetes	c__Bacteroidia	o__Bacteroidales	f__Porphyromonadaceae	g__Parabacteroides
0	940433	k__Bacteria	p__Bacteroidetes	c__Bacteroidia	o__Bacteroidales	f__S24-7	g__
0	942880	k__Bacteria	p__Bacteroidetes	c__Coriobacteriia	o__Coriobacteriales	f__Coriobacteriaceae	g__
0	987581	k__Bacteria	p__Bacteroidetes	c__Bacteroidia	o__Bacteroidales	f__Prevotellaceae	g__Prevotella
0	993934	k__Bacteria	p__Bacteroidetes	c__Bacteroidia	o__Bacteroidales	f__Prevotellaceae	g__Prevotella
0	1013234	k__Bacteria	p__Bacteroidetes	c__Bacteroidia	o__Bacteroidales	f__Prevotellaceae	g__Prevotella
0	1016598	k__Bacteria	p__Bacteroidetes	c__Clostridia	o__Clostridiales	f__Ruminococcaceae	g__
0	1035392	k__Bacteria	p__Bacteroidetes	c__Clostridia	o__Clostridiales	f__Ruminococcaceae	g__
0	1062061	k__Bacteria	p__Bacteroidetes	c__Clostridia	o__Clostridiales	f__Ruminococcaceae	g__
0	1066830	k__Bacteria	p__Bacteroidetes	c__Clostridia	o__Clostridiales	f__Ruminococcaceae	g__
0	1092802	k__Bacteria	p__Bacteroidetes	c__Bacteroidia	o__Bacteroidales	f__	g__
0	1102370	k__Bacteria	p__Bacteroidetes	c__Clostridia	o__Clostridiales	f__Ruminococcaceae	g__
0	2176015	k__Bacteria	p__Bacteroidetes	c__Clostridia	o__Clostridiales	f__[Mogibacteriaceae]	g__Mogibacterium
0	3155554	k__Bacteria	p__Bacteroidetes	c__Clostridia	o__Clostridiales	f__Ruminococcaceae	g__
0	3510697	k__Bacteria	p__Bacteroidetes	c__Bacteroidia	o__Bacteroidales	f__	g__
0	3550461	k__Bacteria	p__Bacteroidetes	c__Clostridia	o__Clostridiales	f__Lachnospiraceae	g__
0	4003061	k__Bacteria	p__Bacteroidetes	c__Bacteroidia	o__Bacteroidales	f__Porphyromonadaceae	g__Parabacteroides
0	4300690	k__Bacteria	p__Bacteroidetes	c__Clostridia	o__Clostridiales	f__Ruminococcaceae	g__
0	4354103	k__Bacteria	p__Bacteroidetes	c__Bacilli	o__Lactobacillales	f__Lactobacillaceae	g__Lactobacillus
0	4432463	k__Bacteria	p__Bacteroidetes	c__Coriobacteriia	o__Coriobacteriales	f__Coriobacteriaceae	g__
0	4465284	k__Bacteria	p__Bacteroidetes	c__Clostridia	o__Clostridiales	f__Ruminococcaceae	NA
0	4480861	k__Bacteria	p__Bacteroidetes	c__Erysipelotrichi	o__Erysipelotrichales	f__Erysipelotrichaceae	g__Catenibacterium
0	New.CleanUp.ReferenceOTU10288	k__Bacteria	p__Bacteroidetes	c__Clostridia	o__Clostridiales	f__Ruminococcaceae	g__
0	New.CleanUp.ReferenceOTU10673	k__Bacteria	p__Bacteroidetes	c__Clostridia	o__Clostridiales	f__Veillonellaceae	g__Phascolarctobacterium
0	New.CleanUp.ReferenceOTU1074	k__Bacteria	p__Bacteroidetes	c__Clostridia	o__Clostridiales	NA	NA
0	New.CleanUp.ReferenceOTU10805	k__Bacteria	p__Bacteroidetes	c__Clostridia	o__Clostridiales	f__Lachnospiraceae	g__
0	New.CleanUp.ReferenceOTU10860	k__Bacteria	p__Bacteroidetes	c__Clostridia	o__Clostridiales	f__Ruminococcaceae	g__
0	New.CleanUp.ReferenceOTU11010	k__Bacteria	p__Bacteroidetes	c__Clostridia	o__Clostridiales	f__Lachnospiraceae	g__Dorea
0	New.CleanUp.ReferenceOTU11289	k__Bacteria	p__Bacteroidetes	c__Clostridia	o__Clostridiales	f__[Mogibacteriaceae]	g__Mogibacterium
0	New.CleanUp.ReferenceOTU1130	k__Bacteria	p__Bacteroidetes	c__Clostridia	o__Clostridiales	f__Lachnospiraceae	g__Roseburia
0	New.CleanUp.ReferenceOTU11690	k__Bacteria	p__Bacteroidetes	c__Clostridia	o__Clostridiales	f__Ruminococcaceae	g__
0	New.CleanUp.ReferenceOTU12347	k__Bacteria	p__Bacteroidetes	c__Clostridia	o__Clostridiales	f__Ruminococcaceae	g__
0	New.CleanUp.ReferenceOTU12609	k__Bacteria	p__Bacteroidetes	c__Clostridia	o__Clostridiales	f__Ruminococcaceae	g__
0	New.CleanUp.ReferenceOTU12631	k__Bacteria	p__Bacteroidetes	c__Clostridia	o__Clostridiales	f__Ruminococcaceae	g__Oscillospira
0	New.CleanUp.ReferenceOTU1269	k__Bacteria	p__Bacteroidetes	c__Clostridia	o__Clostridiales	f__Ruminococcaceae	g__
0	New.CleanUp.ReferenceOTU127	k__Bacteria	p__Bacteroidetes	c__Clostridia	o__Clostridiales	f__Ruminococcaceae	g__
0	New.CleanUp.ReferenceOTU12923	k__Bacteria	p__Bacteroidetes	c__Clostridia	o__Clostridiales	f__Ruminococcaceae	g__
0	New.CleanUp.ReferenceOTU1296	k__Bacteria	p__Bacteroidetes	c__Bacteroidia	o__Bacteroidales	f__S24-7	g__
0	New.CleanUp.ReferenceOTU1367	k__Bacteria	p__Bacteroidetes	c__Clostridia	o__Clostridiales	f__	g__
0	New.CleanUp.ReferenceOTU13854	k__Bacteria	p__Bacteroidetes	c__Clostridia	o__Clostridiales	f__Ruminococcaceae	g__
0	New.CleanUp.ReferenceOTU13960	k__Bacteria	p__Bacteroidetes	c__Clostridia	o__Clostridiales	f__	g__
0	New.CleanUp.ReferenceOTU13979	k__Bacteria	p__Bacteroidetes	c__Clostridia	o__Clostridiales	f__	g__
0	New.CleanUp.ReferenceOTU14148	k__Bacteria	p__Bacteroidetes	c__Bacteroidia	o__Bacteroidales	f__Prevotellaceae	g__Prevotella
0	New.CleanUp.ReferenceOTU14218	k__Bacteria	p__Bacteroidetes	c__Clostridia	o__Clostridiales	f__[Mogibacteriaceae]	g__
0	New.CleanUp.ReferenceOTU14221	k__Bacteria	p__Bacteroidetes	c__Clostridia	o__Clostridiales	f__	g__
0	New.CleanUp.ReferenceOTU14247	k__Bacteria	p__Bacteroidetes	c__Clostridia	o__Clostridiales	f__Clostridiaceae	g__
0	New.CleanUp.ReferenceOTU15015	k__Bacteria	p__Bacteroidetes	c__Clostridia	o__Clostridiales	f__Clostridiaceae	g__
0	New.CleanUp.ReferenceOTU15061	k__Bacteria	p__Bacteroidetes	c__Clostridia	o__Clostridiales	f__Lachnospiraceae	g__Blautia
0	New.CleanUp.ReferenceOTU15191	k__Bacteria	p__Bacteroidetes	c__Erysipelotrichi	o__Erysipelotrichales	f__Erysipelotrichaceae	g__Coprobacillus
0	New.CleanUp.ReferenceOTU15224	k__Bacteria	p__Bacteroidetes	c__Clostridia	o__Clostridiales	f__Ruminococcaceae	NA
0	New.CleanUp.ReferenceOTU1543	k__Bacteria	p__Bacteroidetes	c__Clostridia	o__Clostridiales	f__Ruminococcaceae	g__Oscillospira
0	New.CleanUp.ReferenceOTU15633	k__Bacteria	p__Bacteroidetes	c__Clostridia	o__Clostridiales	f__Ruminococcaceae	g__
0	New.CleanUp.ReferenceOTU15662	k__Bacteria	p__Bacteroidetes	c__Clostridia	o__Clostridiales	f__Ruminococcaceae	g__
0	New.CleanUp.ReferenceOTU1570	k__Bacteria	p__Bacteroidetes	c__Bacilli	o__Turicibacterales	f__Turicibacteraceae	g__Turicibacter
0	New.CleanUp.ReferenceOTU15773	k__Bacteria	p__Bacteroidetes	c__Bacteroidia	o__Bacteroidales	f__Prevotellaceae	g__Prevotella
0	New.CleanUp.ReferenceOTU1614	k__Bacteria	p__Bacteroidetes	c__Bacteroidia	o__Bacteroidales	f__S24-7	g__
0	New.CleanUp.ReferenceOTU16429	k__Bacteria	p__Bacteroidetes	c__Clostridia	o__Clostridiales	f__Ruminococcaceae	g__
0	New.CleanUp.ReferenceOTU16460	k__Bacteria	p__Bacteroidetes	c__Clostridia	o__Clostridiales	f__Lachnospiraceae	g__Blautia
0	New.CleanUp.ReferenceOTU16540	k__Bacteria	p__Bacteroidetes	c__Erysipelotrichi	o__Erysipelotrichales	f__Erysipelotrichaceae	g__Bulleidia
0	New.CleanUp.ReferenceOTU16881	k__Bacteria	p__Bacteroidetes	c__Clostridia	o__Clostridiales	f__Lachnospiraceae	g__Coprococcus
0	New.CleanUp.ReferenceOTU16964	k__Bacteria	p__Bacteroidetes	c__Clostridia	o__Clostridiales	f__Lachnospiraceae	g__Blautia
0	New.CleanUp.ReferenceOTU17058	k__Bacteria	p__Bacteroidetes	c__Clostridia	o__Clostridiales	f__	g__
0	New.CleanUp.ReferenceOTU171	k__Bacteria	p__Bacteroidetes	c__Clostridia	o__Clostridiales	f__[Mogibacteriaceae]	g__
0	New.CleanUp.ReferenceOTU17167	k__Bacteria	p__Bacteroidetes	c__Clostridia	o__Clostridiales	f__Lachnospiraceae	g__
0	New.CleanUp.ReferenceOTU17288	k__Bacteria	p__Bacteroidetes	c__Clostridia	o__Clostridiales	f__Ruminococcaceae	g__
0	New.CleanUp.ReferenceOTU17331	k__Bacteria	p__Bacteroidetes	c__Bacteroidia	o__Bacteroidales	f__S24-7	g__
0	New.CleanUp.ReferenceOTU17501	k__Bacteria	p__Bacteroidetes	c__Clostridia	o__Clostridiales	NA	NA
0	New.CleanUp.ReferenceOTU17698	k__Bacteria	p__Bacteroidetes	c__Clostridia	o__Clostridiales	f__[Mogibacteriaceae]	g__
0	New.CleanUp.ReferenceOTU17929	k__Bacteria	p__Bacteroidetes	c__Clostridia	o__Clostridiales	NA	NA
0	New.CleanUp.ReferenceOTU18001	k__Bacteria	p__Bacteroidetes	c__Clostridia	o__Clostridiales	f__Ruminococcaceae	g__
0	New.CleanUp.ReferenceOTU18147	k__Bacteria	p__Bacteroidetes	c__Clostridia	o__Clostridiales	f__Ruminococcaceae	g__
0	New.CleanUp.ReferenceOTU1836	k__Bacteria	p__Bacteroidetes	c__Bacilli	o__Lactobacillales	f__Lactobacillaceae	g__Lactobacillus
0	New.CleanUp.ReferenceOTU18871	k__Bacteria	p__Bacteroidetes	c__Clostridia	o__Clostridiales	NA	NA
0	New.CleanUp.ReferenceOTU19328	k__Bacteria	p__Bacteroidetes	c__Clostridia	o__Clostridiales	f__Lachnospiraceae	g__Dorea
0	New.CleanUp.ReferenceOTU19534	k__Bacteria	p__Bacteroidetes	c__Clostridia	o__Clostridiales	f__Ruminococcaceae	g__
0	New.CleanUp.ReferenceOTU19673	k__Bacteria	p__Bacteroidetes	c__Bacilli	o__Lactobacillales	f__Lactobacillaceae	g__Lactobacillus
0	New.CleanUp.ReferenceOTU19741	k__Bacteria	p__Bacteroidetes	c__Clostridia	o__Clostridiales	f__Ruminococcaceae	NA
0	New.CleanUp.ReferenceOTU19774	k__Bacteria	p__Bacteroidetes	c__Clostridia	o__Clostridiales	f__Ruminococcaceae	g__
0	New.CleanUp.ReferenceOTU19802	k__Bacteria	p__Bacteroidetes	c__Bacteroidia	o__Bacteroidales	f__S24-7	g__
0	New.CleanUp.ReferenceOTU20060	k__Bacteria	p__Bacteroidetes	c__Bacilli	o__Lactobacillales	f__Lactobacillaceae	g__Lactobacillus
0	New.CleanUp.ReferenceOTU20408	k__Bacteria	p__Bacteroidetes	c__Clostridia	o__Clostridiales	f__Lachnospiraceae	g__
0	New.CleanUp.ReferenceOTU20417	k__Bacteria	p__Bacteroidetes	c__Clostridia	o__Clostridiales	f__	g__
0	New.CleanUp.ReferenceOTU20438	k__Bacteria	p__Bacteroidetes	c__Clostridia	o__Clostridiales	f__Ruminococcaceae	g__
0	New.CleanUp.ReferenceOTU20495	k__Bacteria	p__Bacteroidetes	c__Clostridia	o__Clostridiales	f__Ruminococcaceae	g__Oscillospira
0	New.CleanUp.ReferenceOTU20570	k__Bacteria	p__Bacteroidetes	c__Bacteroidia	o__Bacteroidales	f__Prevotellaceae	g__Prevotella
0	New.CleanUp.ReferenceOTU20651	k__Bacteria	p__Bacteroidetes	c__Clostridia	o__Clostridiales	f__Clostridiaceae	g__Clostridium
0	New.CleanUp.ReferenceOTU21040	k__Bacteria	p__Bacteroidetes	c__Clostridia	o__Clostridiales	f__Ruminococcaceae	g__
0	New.CleanUp.ReferenceOTU21344	k__Bacteria	p__Bacteroidetes	c__Clostridia	o__Clostridiales	f__Ruminococcaceae	g__
0	New.CleanUp.ReferenceOTU21383	k__Bacteria	p__Bacteroidetes	c__Clostridia	o__Clostridiales	f__	g__
0	New.CleanUp.ReferenceOTU21400	k__Bacteria	p__Bacteroidetes	c__Clostridia	o__Clostridiales	f__Ruminococcaceae	g__Oscillospira
0	New.CleanUp.ReferenceOTU21748	k__Bacteria	p__Bacteroidetes	c__Clostridia	o__Clostridiales	f__Ruminococcaceae	g__
0	New.CleanUp.ReferenceOTU21795	k__Bacteria	p__Bacteroidetes	c__Clostridia	o__Clostridiales	f__Ruminococcaceae	g__
0	New.CleanUp.ReferenceOTU22338	k__Bacteria	p__Bacteroidetes	c__Clostridia	o__Clostridiales	f__Ruminococcaceae	g__
0	New.CleanUp.ReferenceOTU22394	k__Bacteria	p__Bacteroidetes	c__Erysipelotrichi	o__Erysipelotrichales	f__Erysipelotrichaceae	g__p-75-a5
0	New.CleanUp.ReferenceOTU22409	k__Bacteria	p__Bacteroidetes	c__Clostridia	o__Clostridiales	f__Ruminococcaceae	g__
0	New.CleanUp.ReferenceOTU22522	k__Bacteria	p__Bacteroidetes	c__Clostridia	o__Clostridiales	NA	NA
0	New.CleanUp.ReferenceOTU22560	k__Bacteria	p__Bacteroidetes	c__Clostridia	o__Clostridiales	f__Ruminococcaceae	NA
0	New.CleanUp.ReferenceOTU22654	k__Bacteria	p__Bacteroidetes	c__Clostridia	o__Clostridiales	f__Ruminococcaceae	g__
0	New.CleanUp.ReferenceOTU22765	k__Bacteria	p__Bacteroidetes	c__Clostridia	o__Clostridiales	f__Clostridiaceae	g__
0	New.CleanUp.ReferenceOTU22948	k__Bacteria	p__Bacteroidetes	c__Clostridia	o__Clostridiales	f__Veillonellaceae	g__Veillonella
0	New.CleanUp.ReferenceOTU23015	k__Bacteria	p__Bacteroidetes	c__Bacteroidia	o__Bacteroidales	f__	g__
0	New.CleanUp.ReferenceOTU23021	k__Bacteria	p__Bacteroidetes	c__Bacilli	o__Lactobacillales	f__Lactobacillaceae	g__Lactobacillus
0	New.CleanUp.ReferenceOTU23035	k__Bacteria	p__Bacteroidetes	c__Clostridia	o__Clostridiales	f__Lachnospiraceae	g__Dorea
0	New.CleanUp.ReferenceOTU23057	k__Bacteria	p__Bacteroidetes	c__Clostridia	o__Clostridiales	f__Ruminococcaceae	g__
0	New.CleanUp.ReferenceOTU23084	k__Bacteria	p__Bacteroidetes	c__Clostridia	o__Clostridiales	f__Ruminococcaceae	g__Oscillospira
0	New.CleanUp.ReferenceOTU23156	k__Bacteria	p__Bacteroidetes	c__Clostridia	o__Clostridiales	f__	g__
0	New.CleanUp.ReferenceOTU23207	k__Bacteria	p__Bacteroidetes	c__Clostridia	o__Clostridiales	f__Ruminococcaceae	g__
0	New.CleanUp.ReferenceOTU23238	k__Bacteria	p__Bacteroidetes	c__Clostridia	o__Clostridiales	f__Ruminococcaceae	g__
0	New.CleanUp.ReferenceOTU23239	k__Bacteria	p__Bacteroidetes	c__Bacteroidia	o__Bacteroidales	f__[Paraprevotellaceae]	g__[Prevotella]
0	New.CleanUp.ReferenceOTU23241	k__Bacteria	p__Bacteroidetes	c__Bacilli	o__Lactobacillales	f__Streptococcaceae	g__Streptococcus
0	New.CleanUp.ReferenceOTU23460	k__Bacteria	p__Bacteroidetes	c__Clostridia	o__Clostridiales	NA	NA
0	New.CleanUp.ReferenceOTU23574	k__Bacteria	p__Bacteroidetes	c__Coriobacteriia	o__Coriobacteriales	f__Coriobacteriaceae	g__
0	New.CleanUp.ReferenceOTU23910	k__Bacteria	p__Bacteroidetes	c__Bacteroidia	o__Bacteroidales	f__S24-7	g__
0	New.CleanUp.ReferenceOTU2410	k__Bacteria	p__Bacteroidetes	c__Bacteroidia	o__Bacteroidales	f__[Paraprevotellaceae]	g__
0	New.CleanUp.ReferenceOTU24269	k__Bacteria	p__Bacteroidetes	c__Clostridia	o__Clostridiales	f__Lachnospiraceae	g__Blautia
0	New.CleanUp.ReferenceOTU24277	k__Bacteria	p__Bacteroidetes	c__Clostridia	o__Clostridiales	f__	g__
0	New.CleanUp.ReferenceOTU24383	k__Bacteria	p__Bacteroidetes	c__Clostridia	o__Clostridiales	NA	NA
0	New.CleanUp.ReferenceOTU24396	k__Bacteria	p__Bacteroidetes	c__Clostridia	o__Clostridiales	f__Ruminococcaceae	g__
0	New.CleanUp.ReferenceOTU24621	k__Bacteria	p__Bacteroidetes	c__Clostridia	o__Clostridiales	f__Ruminococcaceae	g__
0	New.CleanUp.ReferenceOTU24650	k__Bacteria	p__Bacteroidetes	c__Clostridia	o__Clostridiales	f__Ruminococcaceae	g__
0	New.CleanUp.ReferenceOTU2470	k__Bacteria	p__Bacteroidetes	c__Clostridia	o__Clostridiales	f__Ruminococcaceae	g__
0	New.CleanUp.ReferenceOTU2641	k__Bacteria	p__Bacteroidetes	c__Clostridia	o__Clostridiales	f__Lachnospiraceae	g__
0	New.CleanUp.ReferenceOTU2787	k__Bacteria	p__Bacteroidetes	c__Clostridia	o__Clostridiales	f__Lachnospiraceae	NA
0	New.CleanUp.ReferenceOTU288	k__Bacteria	p__Bacteroidetes	c__Clostridia	o__Clostridiales	f__Lachnospiraceae	g__
0	New.CleanUp.ReferenceOTU2983	k__Bacteria	p__Bacteroidetes	c__Clostridia	o__Clostridiales	f__Lachnospiraceae	g__Blautia
0	New.CleanUp.ReferenceOTU3135	k__Bacteria	p__Bacteroidetes	c__Clostridia	o__Clostridiales	f__Ruminococcaceae	g__
0	New.CleanUp.ReferenceOTU3248	k__Bacteria	p__Bacteroidetes	c__Clostridia	o__Clostridiales	f__Ruminococcaceae	g__Oscillospira
0	New.CleanUp.ReferenceOTU333	k__Bacteria	p__Bacteroidetes	c__Coriobacteriia	o__Coriobacteriales	f__Coriobacteriaceae	g__
0	New.CleanUp.ReferenceOTU3569	k__Bacteria	p__Bacteroidetes	c__Clostridia	o__Clostridiales	f__	g__
0	New.CleanUp.ReferenceOTU359	k__Bacteria	p__Bacteroidetes	c__Clostridia	o__Clostridiales	f__Christensenellaceae	g__
0	New.CleanUp.ReferenceOTU3665	k__Bacteria	p__Bacteroidetes	c__Clostridia	o__Clostridiales	f__Ruminococcaceae	g__
0	New.CleanUp.ReferenceOTU3726	k__Bacteria	p__Bacteroidetes	c__Clostridia	o__Clostridiales	f__	g__
0	New.CleanUp.ReferenceOTU3792	k__Bacteria	p__Bacteroidetes	c__Clostridia	o__Clostridiales	f__Ruminococcaceae	g__Oscillospira
0	New.CleanUp.ReferenceOTU3903	k__Bacteria	p__Bacteroidetes	c__Clostridia	o__Clostridiales	NA	NA
0	New.CleanUp.ReferenceOTU4009	k__Bacteria	p__Bacteroidetes	c__Clostridia	o__Clostridiales	f__Lachnospiraceae	NA
0	New.CleanUp.ReferenceOTU4199	k__Bacteria	p__Bacteroidetes	c__Clostridia	o__Clostridiales	f__	g__
0	New.CleanUp.ReferenceOTU4262	k__Bacteria	p__Bacteroidetes	c__Bacteroidia	o__Bacteroidales	f__S24-7	g__
0	New.CleanUp.ReferenceOTU4271	k__Bacteria	p__Bacteroidetes	c__Clostridia	o__Clostridiales	f__Ruminococcaceae	g__
0	New.CleanUp.ReferenceOTU4679	k__Bacteria	p__Bacteroidetes	c__Clostridia	o__Clostridiales	f__	g__
0	New.CleanUp.ReferenceOTU5228	k__Bacteria	p__Bacteroidetes	c__Clostridia	o__Clostridiales	f__Ruminococcaceae	g__
0	New.CleanUp.ReferenceOTU5380	k__Bacteria	p__Bacteroidetes	c__Clostridia	o__Clostridiales	f__	g__
0	New.CleanUp.ReferenceOTU541	k__Bacteria	p__Bacteroidetes	c__Clostridia	o__Clostridiales	f__Ruminococcaceae	g__
0	New.CleanUp.ReferenceOTU5660	k__Bacteria	p__Bacteroidetes	c__Bacilli	o__Lactobacillales	f__Lactobacillaceae	g__Lactobacillus
0	New.CleanUp.ReferenceOTU5713	k__Bacteria	p__Bacteroidetes	c__Clostridia	o__Clostridiales	f__Ruminococcaceae	g__
0	New.CleanUp.ReferenceOTU5803	k__Bacteria	p__Bacteroidetes	c__Clostridia	o__Clostridiales	f__	g__
0	New.CleanUp.ReferenceOTU5883	k__Bacteria	p__Bacteroidetes	c__Clostridia	o__Clostridiales	f__Ruminococcaceae	g__Oscillospira
0	New.CleanUp.ReferenceOTU6005	k__Bacteria	p__Bacteroidetes	c__Clostridia	o__Clostridiales	f__	g__
0	New.CleanUp.ReferenceOTU6096	k__Bacteria	p__Bacteroidetes	c__Clostridia	o__Clostridiales	f__Clostridiaceae	NA
0	New.CleanUp.ReferenceOTU6209	k__Bacteria	p__Bacteroidetes	c__Clostridia	o__Clostridiales	f__Lachnospiraceae	NA
0	New.CleanUp.ReferenceOTU6261	k__Bacteria	p__Bacteroidetes	c__Clostridia	o__Clostridiales	f__Lachnospiraceae	g__[Ruminococcus]
0	New.CleanUp.ReferenceOTU6383	k__Bacteria	p__Bacteroidetes	c__Bacteroidia	o__Bacteroidales	f__Prevotellaceae	g__Prevotella
0	New.CleanUp.ReferenceOTU6405	k__Bacteria	p__Bacteroidetes	c__Clostridia	o__Clostridiales	f__Ruminococcaceae	g__Ruminococcus
0	New.CleanUp.ReferenceOTU65	k__Bacteria	p__Bacteroidetes	c__Clostridia	o__Clostridiales	f__Clostridiaceae	g__
0	New.CleanUp.ReferenceOTU6581	k__Bacteria	p__Bacteroidetes	c__Clostridia	o__Clostridiales	f__Ruminococcaceae	g__Ruminococcus
0	New.CleanUp.ReferenceOTU6726	k__Bacteria	p__Bacteroidetes	c__Clostridia	o__Clostridiales	f__	g__
0	New.CleanUp.ReferenceOTU6815	k__Bacteria	p__Bacteroidetes	c__Clostridia	o__Clostridiales	f__Ruminococcaceae	g__
0	New.CleanUp.ReferenceOTU699	k__Bacteria	p__Bacteroidetes	c__Clostridia	o__Clostridiales	f__Clostridiaceae	g__
0	New.CleanUp.ReferenceOTU7499	k__Bacteria	p__Bacteroidetes	c__Clostridia	o__Clostridiales	f__Ruminococcaceae	g__
0	New.CleanUp.ReferenceOTU7508	k__Bacteria	p__Bacteroidetes	c__Clostridia	o__Clostridiales	f__	g__
0	New.CleanUp.ReferenceOTU7671	k__Bacteria	p__Bacteroidetes	c__Clostridia	o__Clostridiales	f__Ruminococcaceae	g__Oscillospira
0	New.CleanUp.ReferenceOTU7774	k__Bacteria	p__Bacteroidetes	c__Clostridia	o__Clostridiales	f__	g__
0	New.CleanUp.ReferenceOTU7953	k__Bacteria	p__Bacteroidetes	c__Clostridia	o__Clostridiales	f__Ruminococcaceae	g__
0	New.CleanUp.ReferenceOTU8022	k__Bacteria	p__Bacteroidetes	c__Bacilli	o__Lactobacillales	f__Lactobacillaceae	g__Lactobacillus
0	New.CleanUp.ReferenceOTU830	k__Bacteria	p__Bacteroidetes	c__Clostridia	o__Clostridiales	f__Ruminococcaceae	g__Oscillospira
0	New.CleanUp.ReferenceOTU8757	k__Bacteria	p__Bacteroidetes	c__Clostridia	o__Clostridiales	f__Ruminococcaceae	g__
0	New.CleanUp.ReferenceOTU8806	k__Bacteria	p__Bacteroidetes	c__Clostridia	o__Clostridiales	f__	g__
0	New.CleanUp.ReferenceOTU9097	k__Bacteria	p__Bacteroidetes	c__Clostridia	o__Clostridiales	NA	NA
0	New.CleanUp.ReferenceOTU9137	k__Bacteria	p__Bacteroidetes	c__Clostridia	o__Clostridiales	f__Ruminococcaceae	g__
0	New.CleanUp.ReferenceOTU9228	k__Bacteria	p__Bacteroidetes	c__Clostridia	o__Clostridiales	f__Ruminococcaceae	g__
0	New.CleanUp.ReferenceOTU9380	k__Bacteria	p__Bacteroidetes	c__Bacilli	o__Lactobacillales	f__Lactobacillaceae	g__Lactobacillus
0	New.CleanUp.ReferenceOTU9643	k__Bacteria	p__Bacteroidetes	c__Bacilli	o__Lactobacillales	f__Lactobacillaceae	g__Lactobacillus
0	New.CleanUp.ReferenceOTU9783	k__Bacteria	p__Bacteroidetes	c__Clostridia	o__Clostridiales	f__	g__
0	New.ReferenceOTU1	k__Bacteria	p__Bacteroidetes	c__Clostridia	o__Clostridiales	f__Lachnospiraceae	NA
0	New.ReferenceOTU27	k__Bacteria	p__Bacteroidetes	c__Clostridia	o__Clostridiales	f__	g__
0	New.ReferenceOTU31	k__Bacteria	p__Bacteroidetes	c__Clostridia	o__Clostridiales	f__Ruminococcaceae	g__Oscillospira
0	New.ReferenceOTU33	k__Bacteria	p__Bacteroidetes	c__Bacteroidia	o__Bacteroidales	f__S24-7	g__
0	New.ReferenceOTU36	k__Bacteria	p__Bacteroidetes	c__Clostridia	o__Clostridiales	f__	g__
0	New.ReferenceOTU37	k__Bacteria	p__Bacteroidetes	c__Clostridia	o__Clostridiales	f__	g__
0	New.ReferenceOTU39	k__Bacteria	p__Bacteroidetes	c__Clostridia	o__Clostridiales	f__Lachnospiraceae	NA
0	New.ReferenceOTU44	k__Bacteria	p__Bacteroidetes	c__Clostridia	o__Clostridiales	f__	g__
0	New.ReferenceOTU45	k__Bacteria	p__Bacteroidetes	c__Clostridia	o__Clostridiales	f__	g__
0	New.ReferenceOTU47	k__Bacteria	p__Bacteroidetes	c__Bacilli	o__Lactobacillales	f__Lactobacillaceae	g__Lactobacillus
0	New.ReferenceOTU48	k__Bacteria	p__Bacteroidetes	c__Clostridia	o__Clostridiales	f__Ruminococcaceae	g__
0	New.ReferenceOTU51	k__Bacteria	p__Bacteroidetes	c__Clostridia	o__Clostridiales	f__Ruminococcaceae	g__
0	New.ReferenceOTU53	k__Bacteria	p__Bacteroidetes	c__Clostridia	o__Clostridiales	f__	g__
0	New.ReferenceOTU57	k__Bacteria	p__Bacteroidetes	c__Clostridia	o__Clostridiales	f__Ruminococcaceae	g__
0	New.ReferenceOTU59	k__Bacteria	p__Bacteroidetes	c__Bacteroidia	o__Bacteroidales	NA	NA
0	New.ReferenceOTU60	k__Bacteria	p__Bacteroidetes	c__Clostridia	o__Clostridiales	f__	g__
0	New.ReferenceOTU62	k__Bacteria	p__Bacteroidetes	c__Clostridia	o__Clostridiales	f__Lachnospiraceae	g__[Ruminococcus]
0	New.ReferenceOTU64	k__Bacteria	p__Bacteroidetes	c__Bacilli	o__Lactobacillales	f__Lactobacillaceae	g__Lactobacillus
0	New.ReferenceOTU66	k__Bacteria	p__Bacteroidetes	c__Clostridia	o__Clostridiales	f__Clostridiaceae	g__
0	New.ReferenceOTU67	k__Bacteria	p__Bacteroidetes	c__Clostridia	o__Clostridiales	f__Ruminococcaceae	g__
0	New.ReferenceOTU68	k__Bacteria	p__Bacteroidetes	c__Clostridia	o__Clostridiales	f__Ruminococcaceae	g__
0	New.ReferenceOTU76	k__Bacteria	p__Bacteroidetes	c__Coriobacteriia	o__Coriobacteriales	f__Coriobacteriaceae	g__Collinsella
0	New.ReferenceOTU83	k__Bacteria	p__Bacteroidetes	c__Clostridia	o__Clostridiales	f__	g__
